# Supplementary material
Source: Springer Nature journal article supplement (https://www.springermedizin.de/resource/supplementary/12889_2009_2118_MOESM1_ESM.pdf/9484624)

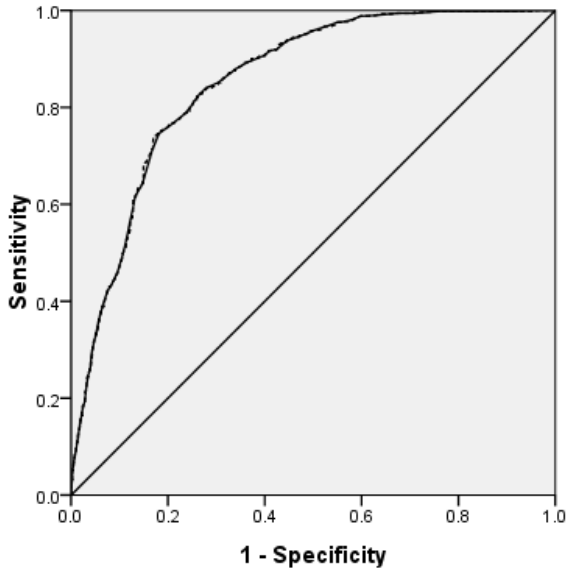

Source of the Curve

— risk score

- - - logistic probability

— Reference Line

Supplement: MOESM1 [file 9484624]
